# Supplementary material for: Population pharmacokinetic modelling to quantify the magnitude of drug-drug interactions between amlodipine and antiretroviral drugs
Source: PubMed Central journal article supplement (PMC8184532; doi:10.1007/s00228-020-03060-2), 2021-01-16

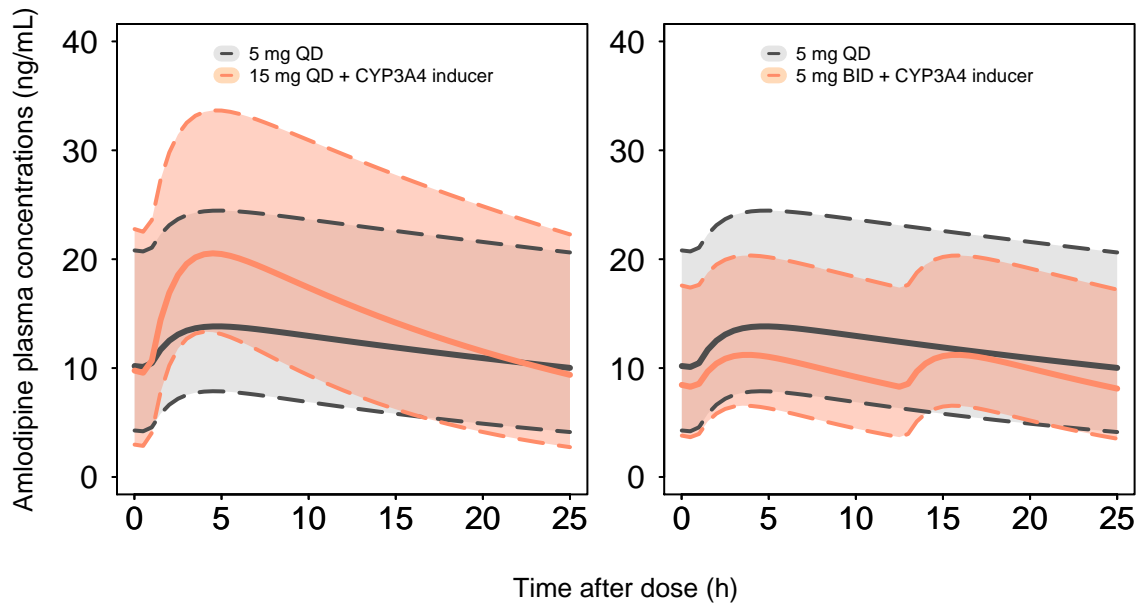

Supplement: 228_2020_3060_MOESM2_ESM.pdf [file 228_2020_3060_MOESM2_ESM.pdf]
